# Supplementary material
Source: PubMed Central journal article supplement (PMC6876859)

## SUPPLEMENTAL

**eTable 1.** Verbal and visuospatial memory indices and associated neuroanatomic structures

| <b>Cognitive Domain</b> | <b>Test and Score</b>                        | <b>Structure Volume</b> | <b>Adjacent Subcortical WM</b>                 | <b>Laterality</b> |
|-------------------------|----------------------------------------------|-------------------------|------------------------------------------------|-------------------|
| Verbal Memory           | HVLT-R Total Recall<br>HVLT-R Delayed Recall | Hippocampus             | Entorhinal<br>Parahippocampal<br>Temporal pole | Left              |
| Visuospatial Memory     | BVMT-R Total Recall<br>BVMT-R Delayed Recall | Hippocampus             | Entorhinal<br>Parahippocampal<br>Temporal pole | Right             |

Abbreviations: HVLT-R, Hopkins Verbal Learning Test-Revised; BVMT-R, Brief Visuospatial

Memory Test-Revised; WM, white matter

These regions of interest (ROIs) were based on prior research implicating their role in the associated neurocognitive domains.

**eTable 2a.** Missing data on longitudinal follow-up (N=27)

| <b>Missing Imaging<sup>a</sup></b> | <b>Patients, No. (%)</b> |
|------------------------------------|--------------------------|
| Baseline                           | 2 (7.7%)                 |
| 3 months                           | 1 (3.8%)                 |
| 6 months                           | 1 (3.8%)                 |
| 12 months                          | 9 (34.6%)                |
| <b>Missing NCA</b>                 | <b>Patients, No. (%)</b> |
| Baseline                           | 0 (0.0%)                 |
| 3 months                           | 3 (11.5%)                |
| 6 months                           | 2 (7.7%)                 |
| 12 months                          | 8 (30.8%)                |
| <b>Missing Both<sup>b</sup></b>    | <b>Patients, No. (%)</b> |
| Baseline                           | 0 (0.0%)                 |
| 3 months                           | 0 (0.0%)                 |
| 6 months                           | 0 (0.0%)                 |
| 12 months                          | 4 (15.4%)                |

<sup>a</sup>2 patients are missing 2 imaging time points (ID 45: 3 and 12; ID 4: 6 and 12)

<sup>b</sup>4 patients with both missing time points at 12 months for various reasons (1 dropped, 1 missing data point, 2 not yet tested)

Abbreviations: NCA, neurocognitive assessment

**eTable 2b.** Differences in patient characteristics between subjects with and without missing data (N=27)

|                                           | Imaging | NCA   |
|-------------------------------------------|---------|-------|
| <b>Demographic</b>                        |         |       |
| Gender                                    | .863    | .930  |
| Race                                      | .513    | .369  |
| Age                                       | .939    | .057  |
| Education                                 | .006*   | .912  |
| <b>Cancer or Treatment Characteristic</b> |         |       |
| Glioma                                    | .883    | .013* |
| Proton Beam Therapy                       | .228    | .895  |
| Chemotherapy                              |         |       |
| Concurrent                                | .842    | .310  |
| Adjuvant                                  | .581    | .048* |
| Steroids                                  | .085    | .484  |
| Seizures                                  | .547    | .930  |

*P*-value from Pearson chi-square (categorical) and independent samples t-test (continuous) between missing and no missing follow-up time points. \*Significant at two-sided level  $P < .05$ .

Abbreviations: NCA, neurocognitive assessment

eFigure 1

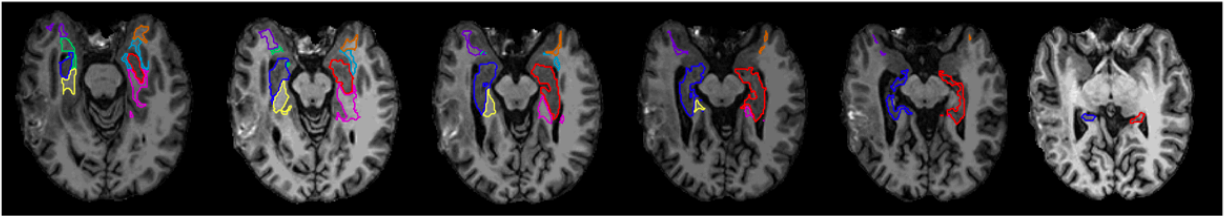

**Color key:**

Red = left hippocampus  
Aqua blue = left entorhinal  
Pink = left parahippocampal  
Orange = left temporal

Dark blue = right hippocampus  
Green = right entorhinal  
Yellow = right parahippocampal  
Purple = right temporal

eFigure 2

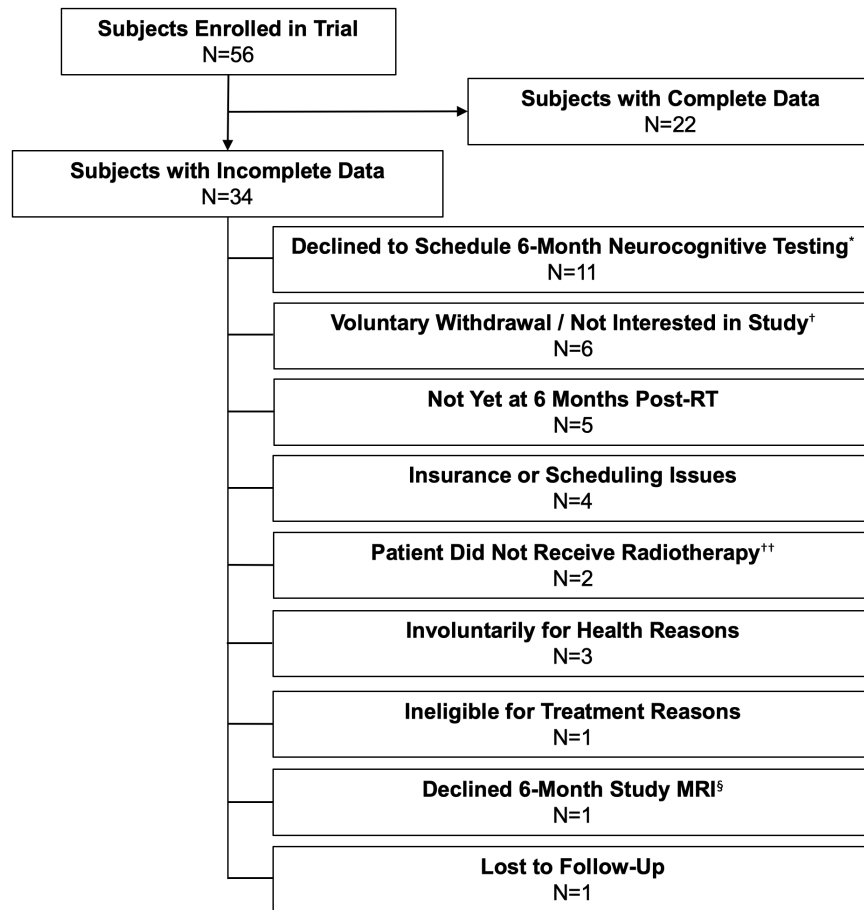

eFigure 3

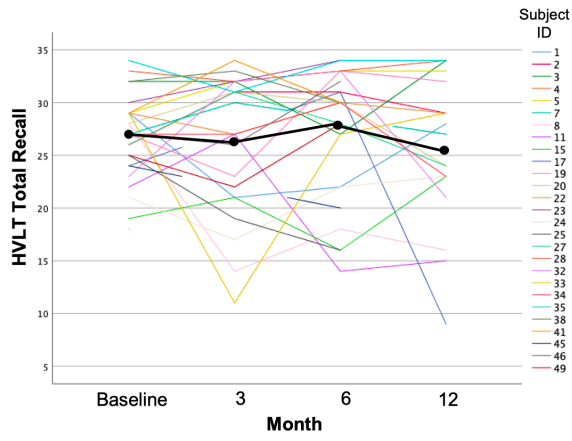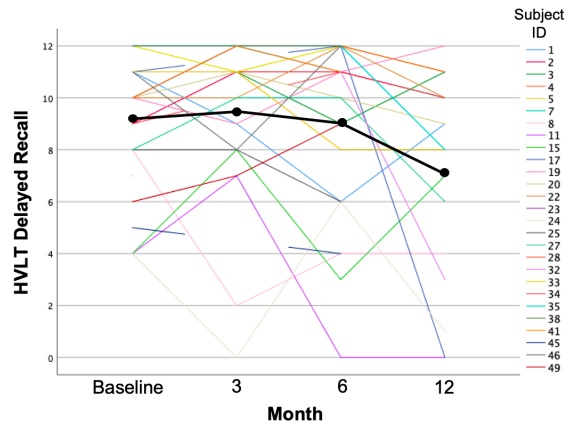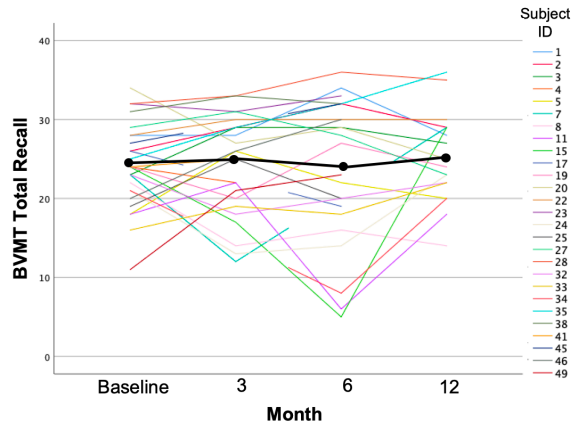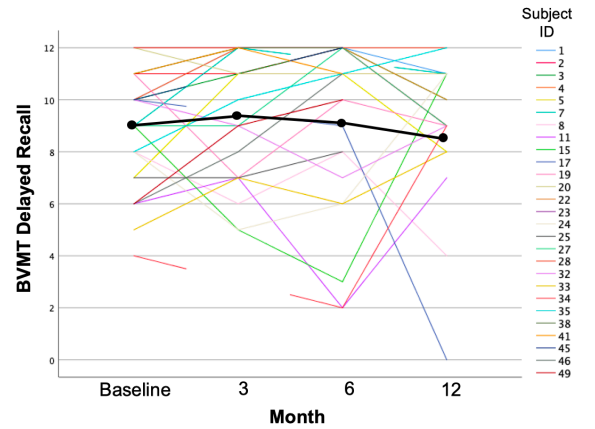

Supplement: NIHMS1537241-supplement-1.pdf [file NIHMS1537241-supplement-1.pdf]
